# Supplementary material
Source: PubMed Central journal article supplement (PMC7948300)
Supplement: advancesADV2020001996-suppl1.pdf [file advancesADV2020001996-suppl1.pdf]

## Supplementary information

**Supplemental Table 1 : antibodies for flow cytometry**

| Name                                                    | Fluorochrome | Clone       | Company                  | Catalog Number |
|---------------------------------------------------------|--------------|-------------|--------------------------|----------------|
| human Fc Receptor binding inhibitor polyclonal antibody |              |             | eBioscience              | 16-9161-73     |
| anti-human Fetal Hemoglobin                             | APC          |             | Life Technologies        | MHF05          |
| anti-human Hemoglobin $\beta$                           | PE           | 37-8        | Santa Cruz Biotechnology | sc-21757       |
| anti-human HLA-ABC                                      | PE           | G46-2.6     | BD Bioscience            | 555553         |
| anti-human CD36                                         | FITC         | C836        | BD Bioscience            | 555454         |
| anti-human CD235a (GYPA)                                | PE-Cy7       | GA-R2       | BD Bioscience            | 563666         |
| anti-human CD71                                         | APC          | M-A712      | BD Bioscience            | 551374         |
| anti-human CD45                                         | APC          | HI30        | BD Bioscience            | 555485         |
| anti-human CD33                                         | BV421        | P67.6       | BD Bioscience            | 744761         |
| anti-human CD19                                         | BV605        | HIB19       | BD Bioscience            | 740394         |
| anti-human CD3                                          | BB700        | SK7         | BD Bioscience            | 566575         |
| anti-human CD271 (NGFR)                                 | APC          | ME20.4-1.H4 | Miltenyi Biotec          | 130-113-418    |
| anti-human CD34                                         | PE           | AC136       | Miltenyi Biotec          | 130-113-179    |
| IgG1, $\kappa$ isotype control                          | APC          |             | Life Technologies        | MG105          |
| IgG1, $\kappa$ isotype control                          | APC          |             | BD Bioscience            | 550854         |
| IgG1, $\kappa$ isotype control                          | FITC         |             | BD Bioscience            | 555748         |
| IgG1, $\kappa$ isotype control                          | BV421        |             | BD Bioscience            | 562438         |
| IgG1, $\kappa$ isotype control                          | BV605        | X40         | BD Bioscience            | 562652         |
| IgG1, $\kappa$ isotype control                          | BB700        | X40         | BD Bioscience            | 566404         |
| IgG2a, $\kappa$ isotype control                         | APC          | G155-178    | BD Bioscience            | 551414         |
| IgG2a, $\kappa$ isotype control                         | PE           |             | BD Bioscience            | 555574         |
| IgG2a, $\kappa$ isotype control                         | PE           | S43.10      | Miltenyi Biotec          | 130-113-272    |
| IgG2b, $\kappa$ isotype control                         | PE-Cy7       |             | BD Bioscience            | 560542         |

All antibodies were mouse monoclonal antibodies, unless differently specified.

Supplemental Table 2: primer list

| PCR                   |               |                                 |
|-----------------------|---------------|---------------------------------|
| Gene/amplicon         | name          | sequence                        |
| HBA 1/2               | 3820 F        | TATCGCCAGAGGGAAAGGGA            |
|                       | 4870 R        | CTTGAAGTTGACCGGTCCA             |
| HBA1/2 sequencing     | 894 R         | TAGGTCTTGGTGGTGGGGAA            |
| HBA2                  | 611 F         | GCACTCTTCTGGTCCCCAC             |
|                       | 1512R         | GCAGAGAGGTCTTGGTCTG             |
| HBA1                  | HBA EX1F      | CCGACAAGACCAACGTCAA             |
|                       | 5614 R        | CTCTAGGGTCCAGCGTTTTTCC          |
| AAVS1                 | MA359         | CAGCTCAGGTTCTGGGAGAG            |
|                       | MA360         | CTTGTAGGCCTGCATCATCA            |
| HBA1/del              | 3820 F        | TATCGCCAGAGGGAAAGGGA            |
|                       | 5614 R        | CTCTAGGGTCCAGCGTTTTTCC          |
| HBB                   | F7895         | AGGCCATCACTAAAGGCACC            |
|                       | R8327         | AGTCAGGGCAGAGCCATCTA            |
| HBB promoter          | HBB9 F        | CTGTCTCCACATGCCAGTT             |
|                       | HBB9 R        | GGAGACGCAGGAAGAGATCC            |
| Off Target 1          | OT1-F         | CCTCTGCTGGCAGGATTT              |
|                       | OT1-R         | AGCAAGGGTAAGAATCTGTCTC          |
| Off-Target 2          | OT2-F         | TCTCACAATTCAAGAGGCCAGA          |
|                       | OT2-R         | TCAGACACACACAGGGAGAG            |
| Off-Target 3          | OT3-F         | GTTCTCCAGCAGCCTTTCA             |
|                       | OT3-R         | AGCACTTCCAAAGGGTTGT             |
| ddPCR                 |               |                                 |
| On-target 3' junction | 3'HBA INT F   | TGGACAAACCACAACACTAGAATGC       |
|                       | 3'HBA INT 3 R | AAGTGCGGGAAGTAGGTCTT            |
|                       | 3'HBA INT PRB | 56-FAM/CTGTCTCCTGCCGACAAGACCAAC |
| HBA2                  | HBA2 3' F     | GCCCTTCCTGGTCTTTGAATA           |
|                       | HBA2 3' R     | ACCTCCATTGTTGGCACAT             |
|                       | HBA2 3' PRB   | 56-FAM/TGTGTGTGCCTGGGTTCTCTCTAT |
| ALB                   | ALB F         | GCTGTCATCTTTGTGGGCTGT           |
|                       | ALB R         | ACTCATGGGAGCTGCTGGTTC           |
|                       | ALB P         | CCTGTCATGCCACACAAATCTCTCC       |
| qPCR                  |               |                                 |
| GAPDH                 | GAPDH F       | CTTCATTGACCTCAACTACATGGTTT      |
|                       | GAPDH R       | TGGGATTTCCATTGATGACAAG          |
| HBA1/HBA2             | HBA F         | CGGTCAACTTCAAGCTCCTAA           |
|                       | HBA R         | ACAGAAGCCAGGAACCTGTGTC          |
| HBB                   | HBB F         | GCAAGGTGAACGTGGATGAAGT          |
|                       | HBB R         | TAACAGCATCAGGAGTGGACAGA         |
| HBB AS3               | HBBAS3 F      | AAGGGCACCTTTGCCAG               |
|                       | HBBAS3 R      | GCCACCACTTTCTGATAGGCAG          |
| HBG1/HBG2             | HBG1 2 F      | CCTGTCCTCTGCCTCTGCC             |
|                       | HBG1 2 R      | GGATTGCCAAAACGGTCCAC            |
| HBD                   | HBD F         | CAAGGGCACTTTTCTCAG              |
|                       | HBD R         | AATTCCTTGCCAAAGTTGC             |
| GYPA                  | hGYPA F       | GGTGGAATGCACACTTCAA             |
|                       | hGYPA R       | ACCCTTCTCCGGTTTCTCTC            |

F=forward; R=reverse, PRB=probe.

Supplementary data

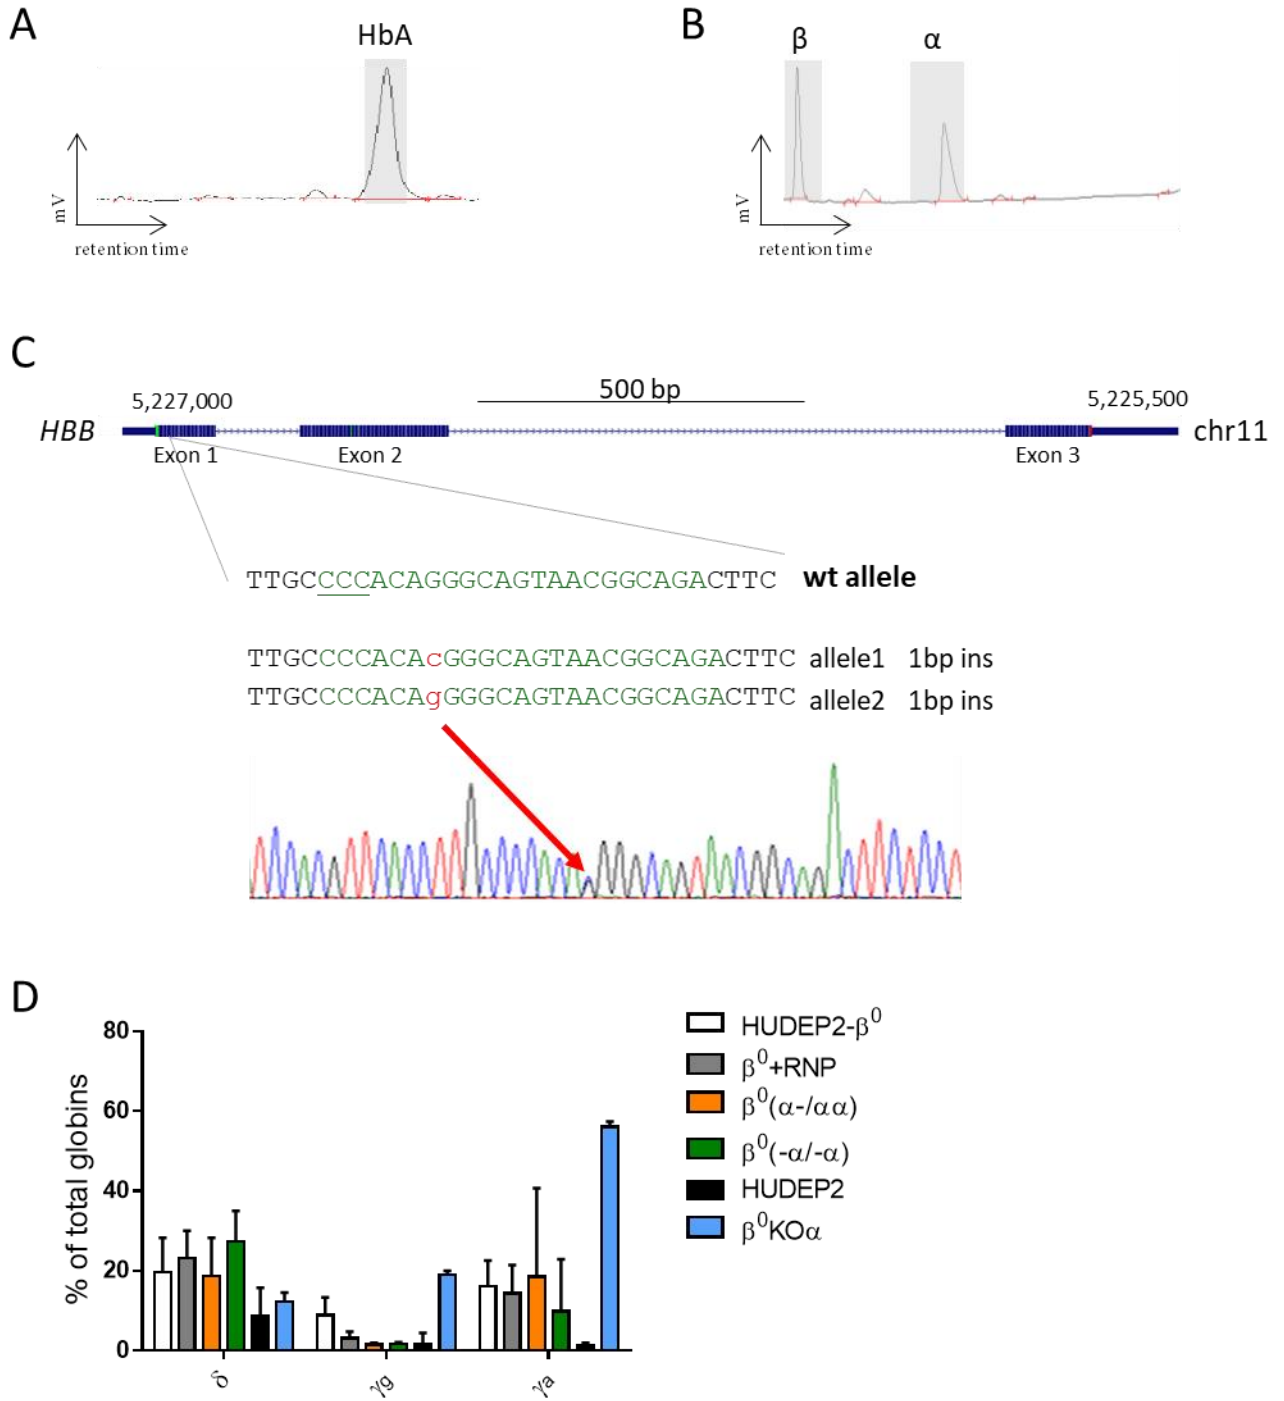

**Supplementary figure 1. Genotype of HUDEP-2  $\beta^0$** 

(A-B) Representative HPLC chromatograms of globin tetramer (A) and b-like subunits (B) analysis. HbA, adult hemoglobin ( $\alpha_2\beta_2$ ). (C) Schematic representation of the  $\beta$ -globin gene (*HBB*; hg38). Reference allele (wt) is shown above HUDEP-2  $\beta^0$  Sanger sequencing profiles. Frameshift disruption occur at leucine 15. gRNA target site is shown in green, PAM sequence is underlined and +1 insertions are shown in red. (D) RT-qPCR quantification of  $\beta$ -like globin mRNA ratios in HUDEP-2  $\beta^0$  (n=3-5) and in single cell clones with monoallelic ( $\alpha^-/\alpha\alpha$ ; n=3) or biallelic ( $\alpha^-/\alpha^-$ ; n=3) *HBA2* deletions.  $\beta^0$ + RNP = HUDEP2  $\beta^0$  bulk population edited with gRNA HBA15/Cas9.  $\beta^0$  KOa= HUDEP2  $\beta^0$  bulk population edited with gRNA HBB/Cas9 to induce a-globin KO. Bars represent mean $\pm$ SD (n=3; \*\* p<0.01, ANOVA, Tukey's test).

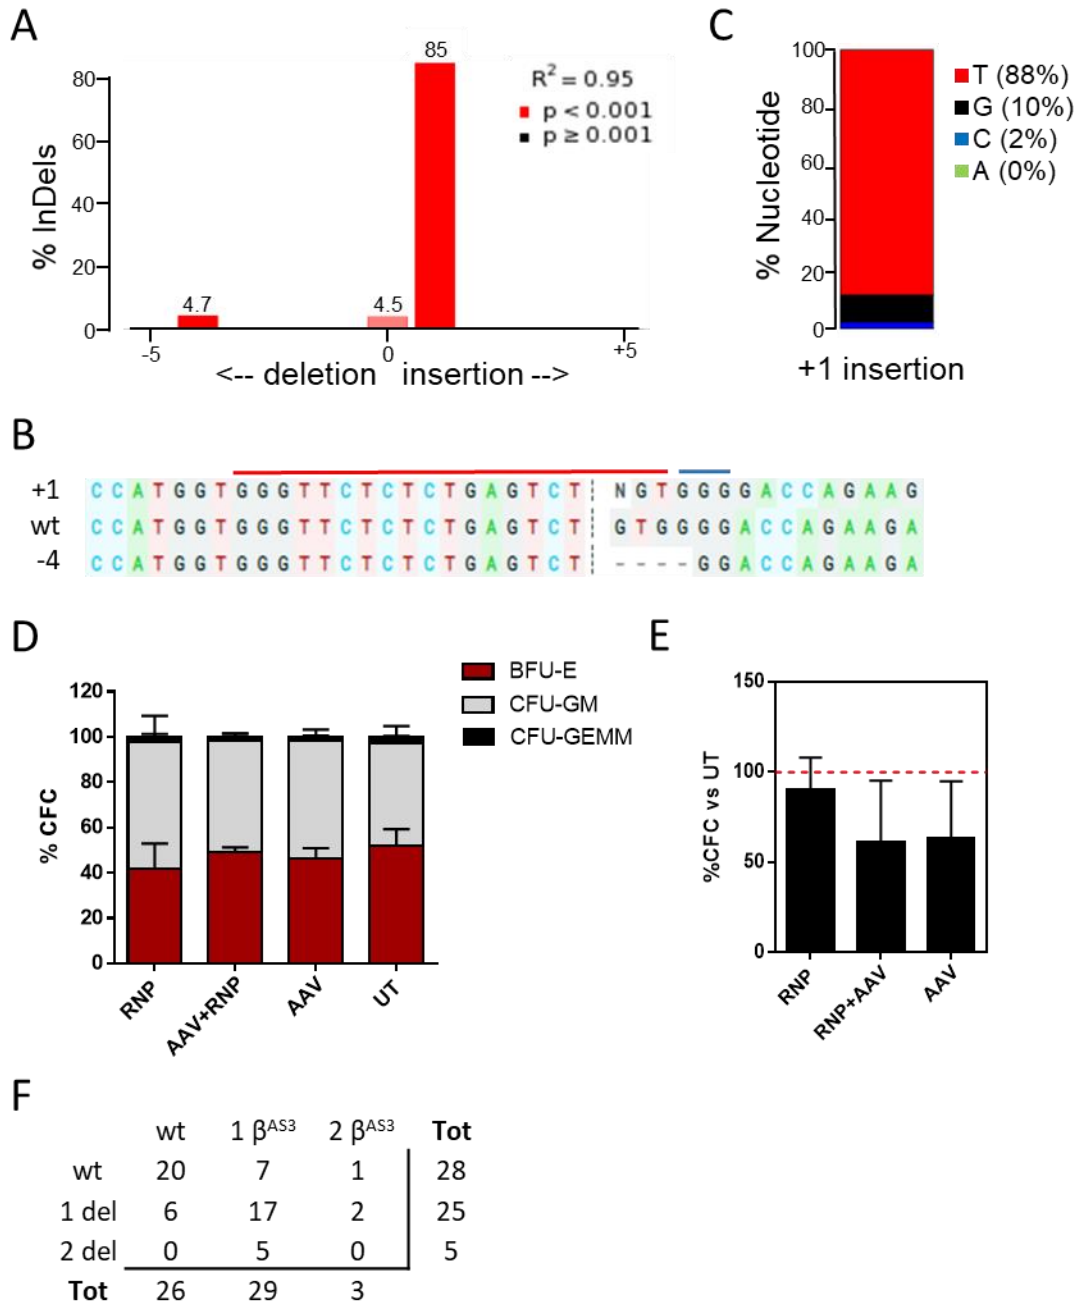

### Supplemental Figure 2. *Ex vivo* characterization of edited HSPCs.

(A-C) Representative InDel spectrum (A), sequence (B) and +1 nucleotide insertion probability (C) for gRNA HBA15. In (B) Red line: gRNA sequence; blue line: PAM sequence. (D) Colony formation unit (CFU) frequency in edited HSPCs. CFU-GEMM, granulocyte, erythroid, macrophage, megakaryocyte; BFU-E, burst-forming unit-erythroid; CFU-GM, granulocyte, macrophage. Bars represent mean  $\pm$ SD (n=3-5). (E) CFC number expressed as percentage of untreated control (UT). Bars represent mean  $\pm$ SD (n=3-5), red dashed line indicates 100%. (F) Colony genotypes shown in Figure 3I.

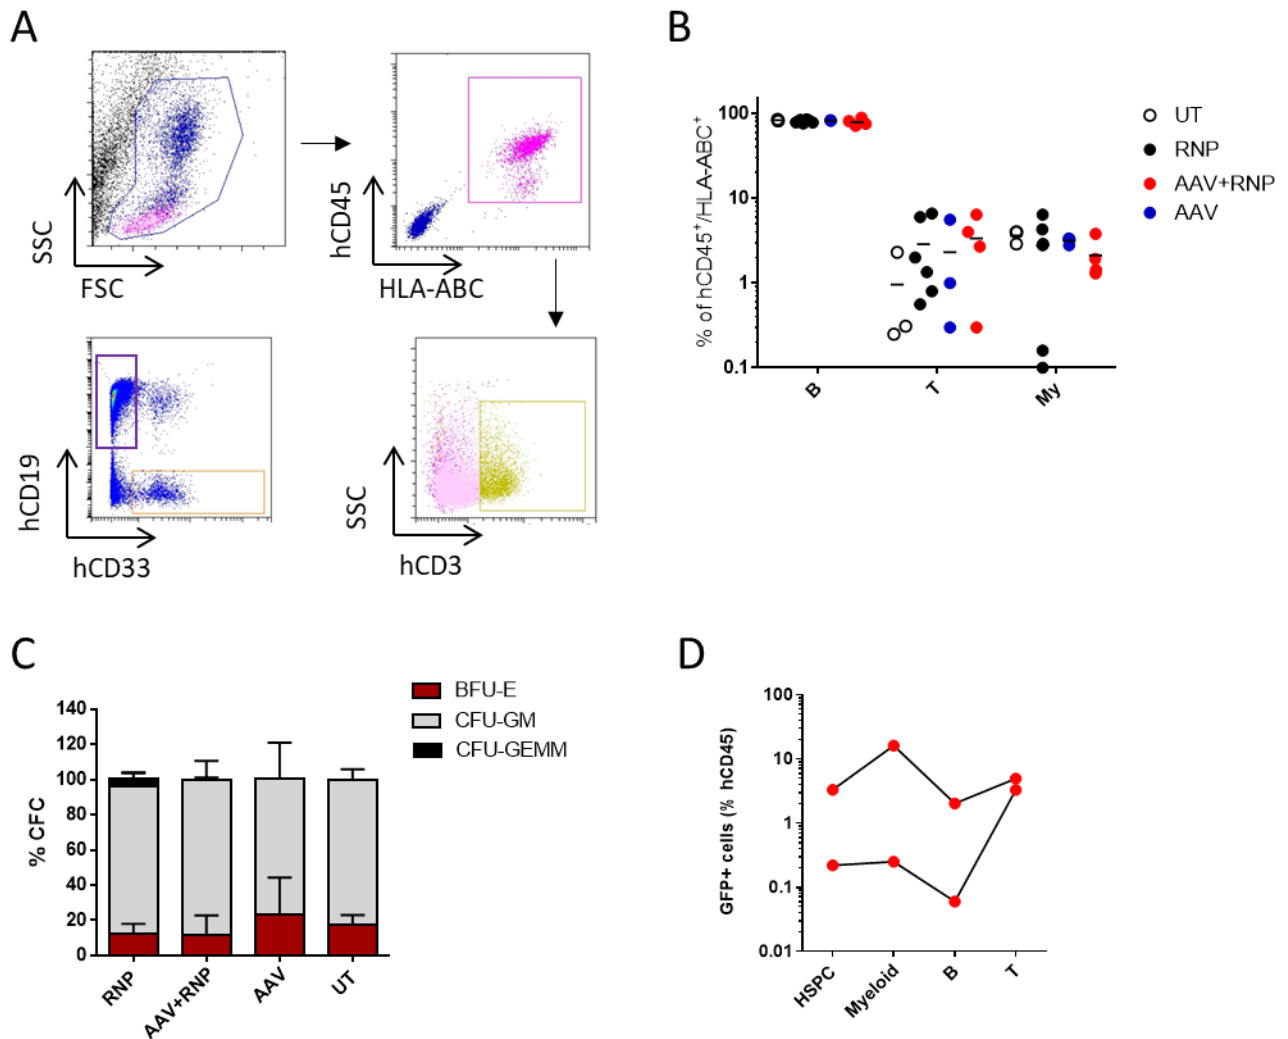

**Supplemental Figure 3. *In vivo* characterization of edited HSPCs.**

(A) Gating strategy to analyze engraftment levels and cell lineages of human xenografts in NSG mice. Representative plots for quantification of human hematopoietic (CD45<sup>+</sup>/HLA-ABC<sup>+</sup>), human B (CD19<sup>+</sup>), human myeloid (CD33<sup>+</sup>) and human T (CD3<sup>+</sup>) cells. (B) Immunophenotyping of human xenografts in bone marrow of NSG mice. Each dot represents one animal, lines indicate mean. (C) Colony formation unit (CFU) frequency in bone marrow-derived CD34. CFU-GEMM, granulocyte, erythroid, macrophage, megakaryocyte; BFU-E, burst-forming unit-erythroid; CFU-GM, granulocyte, macrophage. Bars represent mean  $\pm$ SD (n=2-4). (D) GFP positive cells in HSPCs (CD34), myeloid (CD33), B (CD19) and T (CD3) cells in BM of transplanted mice. Each line represents one animal.

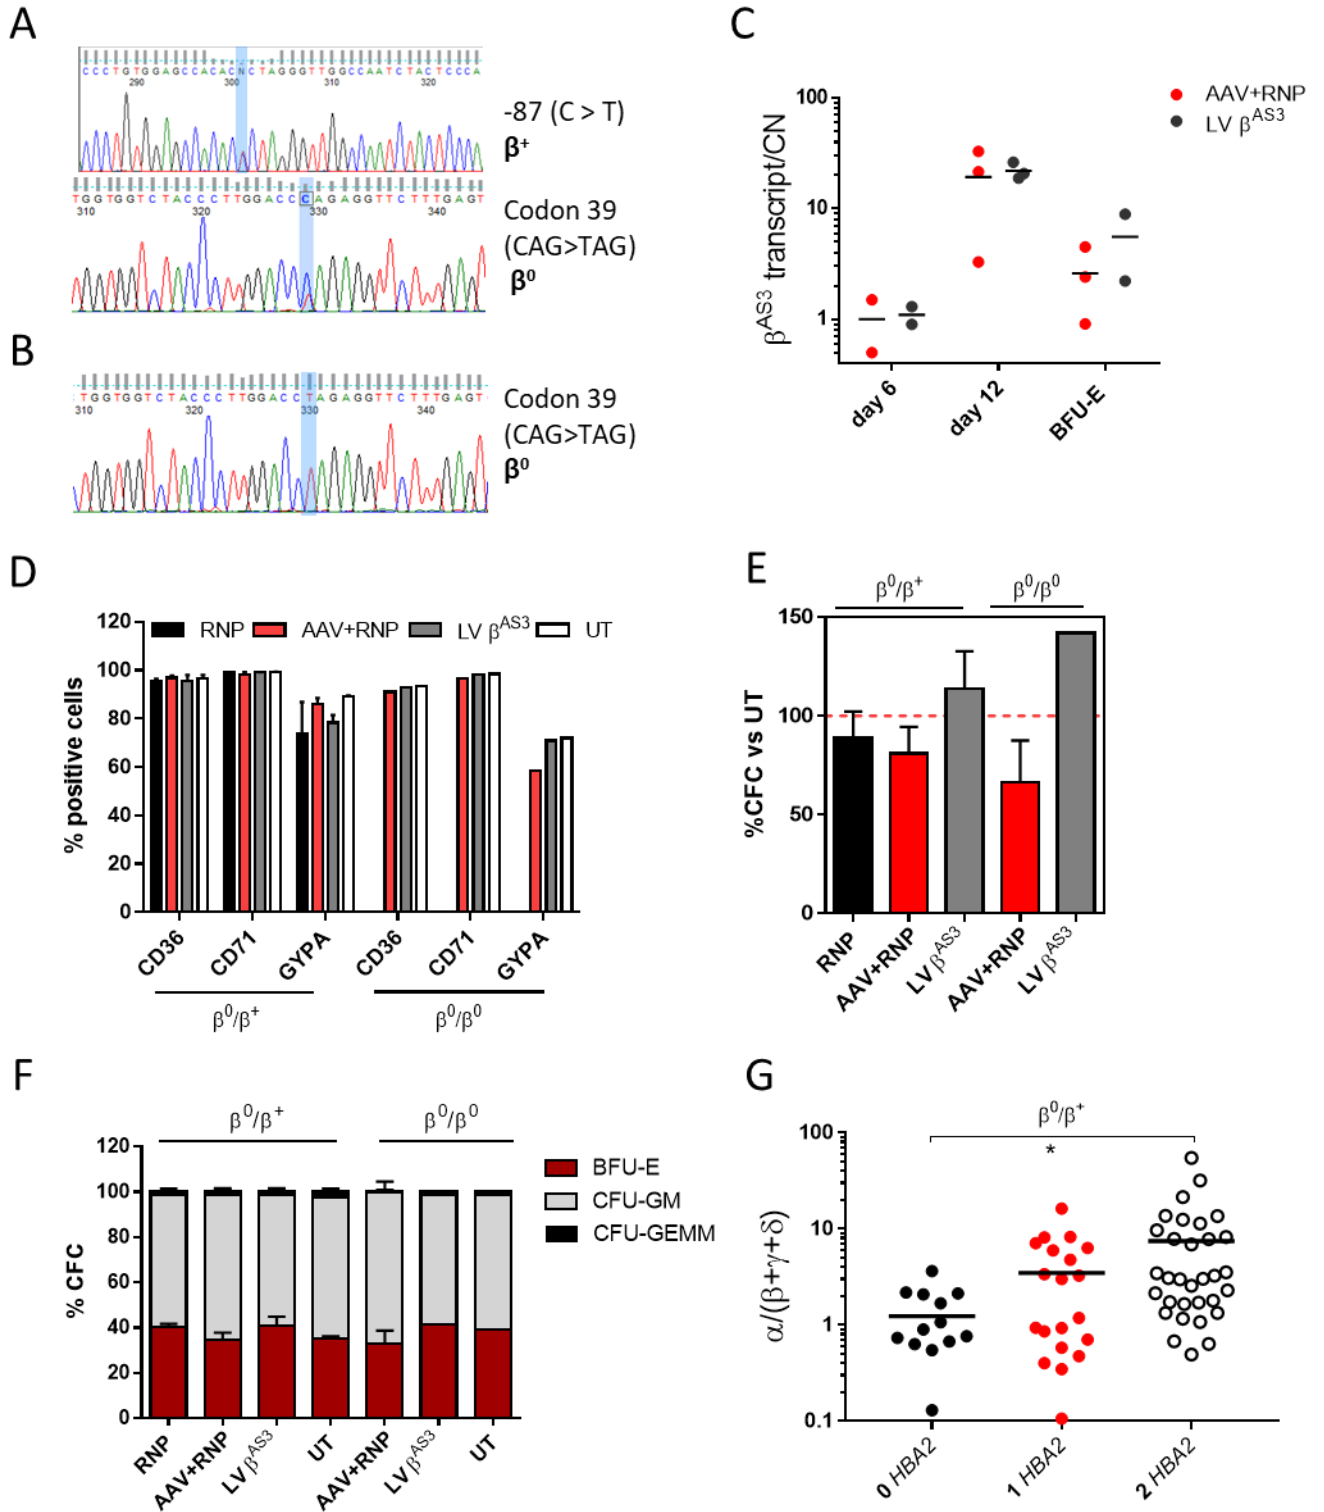

**Supplemental figure 4. Characterization of edited thalassemic HPSCs.**

**(A-B)** Sanger sequencing of *HBB* gene in patients' HSPCs. Patient 1 carries the -87 C>T  $\beta^+$  mutation in heterozygosis with the codon 39 (CAG>TAG)  $\beta^0$  mutation (A). Patient 2 is homozygous for the codon 39 (CAG>TAG)  $\beta^0$  mutation (B). Blue boxes highlight the mutated nucleotides. **(C)**  $\beta^{AS3}$  RNA expression during erythroid differentiation in  $\beta^+$  erythroblasts. Values are normalized per copy number (CN). Black lines indicate mean. **(D)** Flow-cytometry analysis at day 12 of erythroid differentiation of edited HSPCs. Results are shown as mean  $\pm$ SD (n=1-3). **(E)** CFC numbers expressed as percentage of untreated control (UT). Red dotted line indicates 100%; bars represent mean  $\pm$ SD (n=1-3). **(F)** Colony-forming cell (CFC) frequency in edited HSPCs (mean  $\pm$ SD). CFU-GEMM, granulocyte, erythroid, macrophage, megakaryocyte; BFU-E, burst-forming unit-erythroid; CFU-GM, granulocyte, macrophage. **(G)**  $\alpha/\beta$ -like globin mRNA ratios in edited thalassemic BFU-E (n=67) are plotted. 2 HBA2 colonies come from untreated and wt edited BFUE. Each dot represents a single colony. Black lines indicate mean (n= ;\*, p<0.01; 1 way ANOVA, Dunn's test).



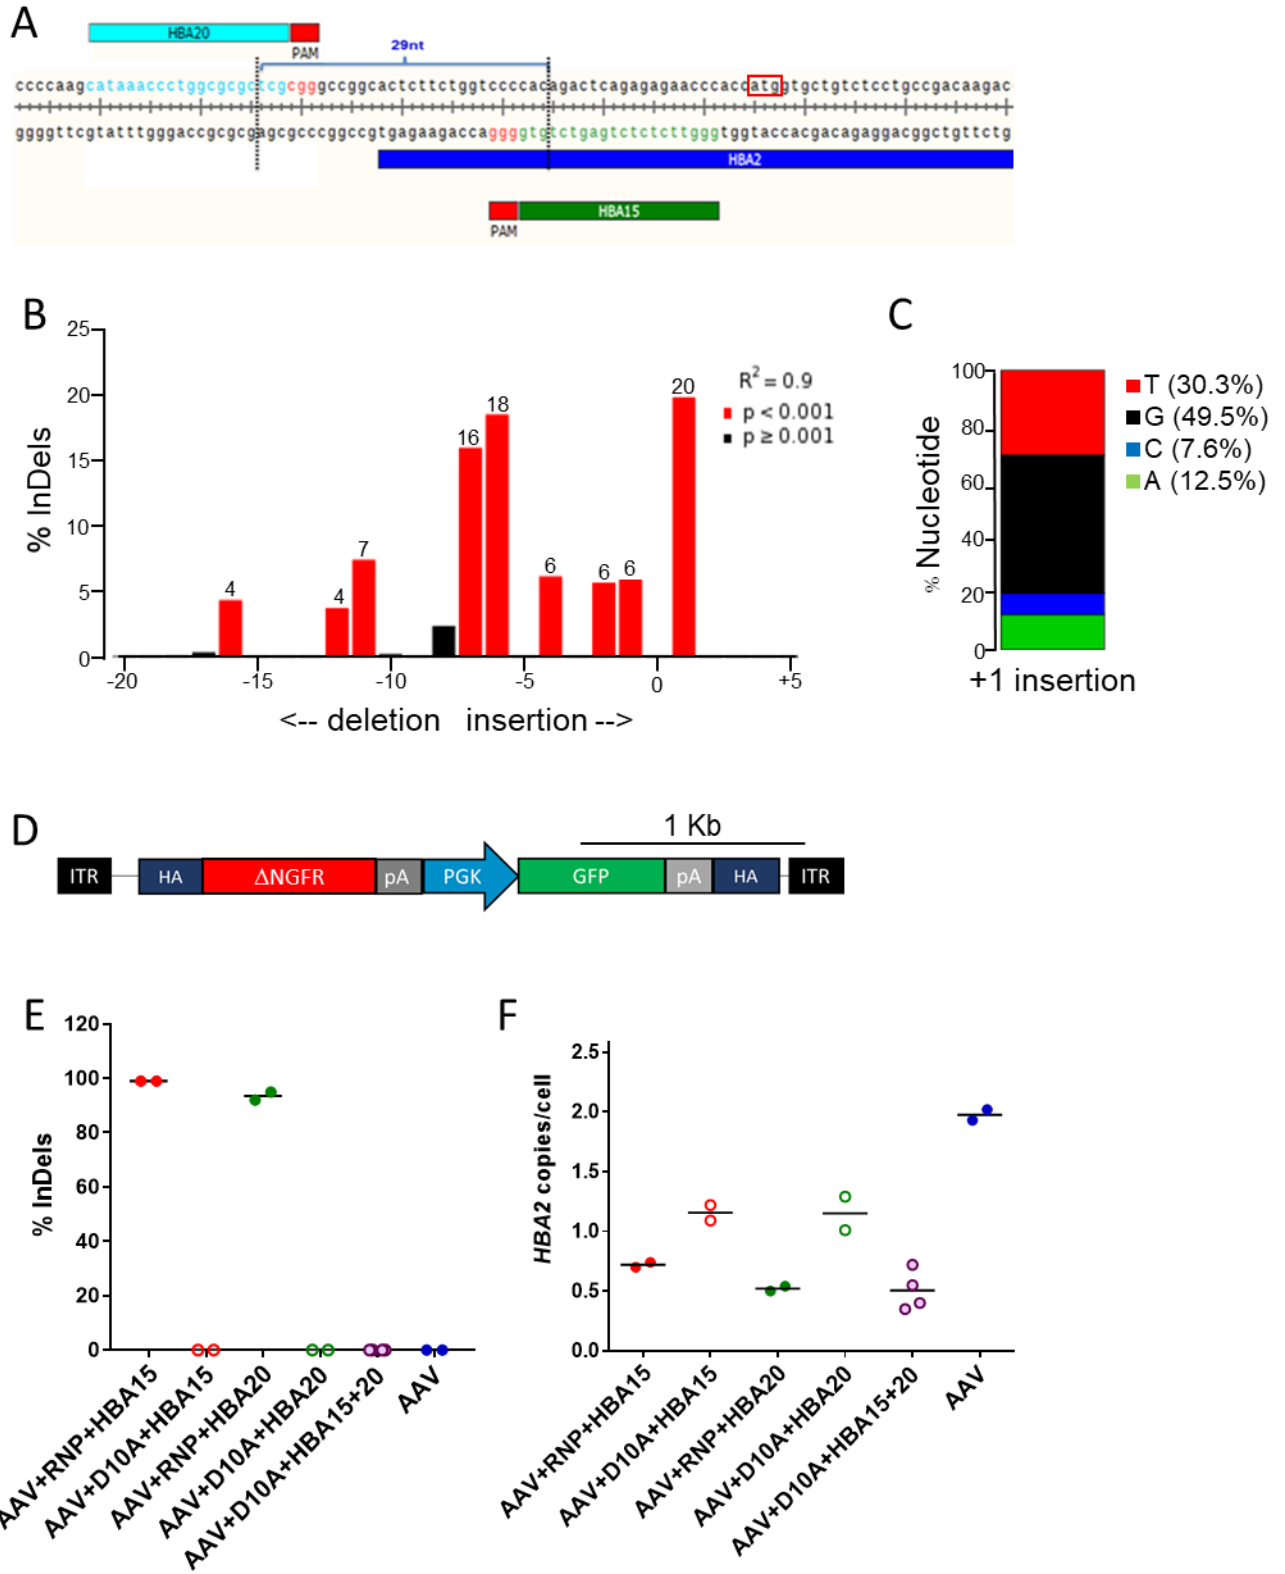

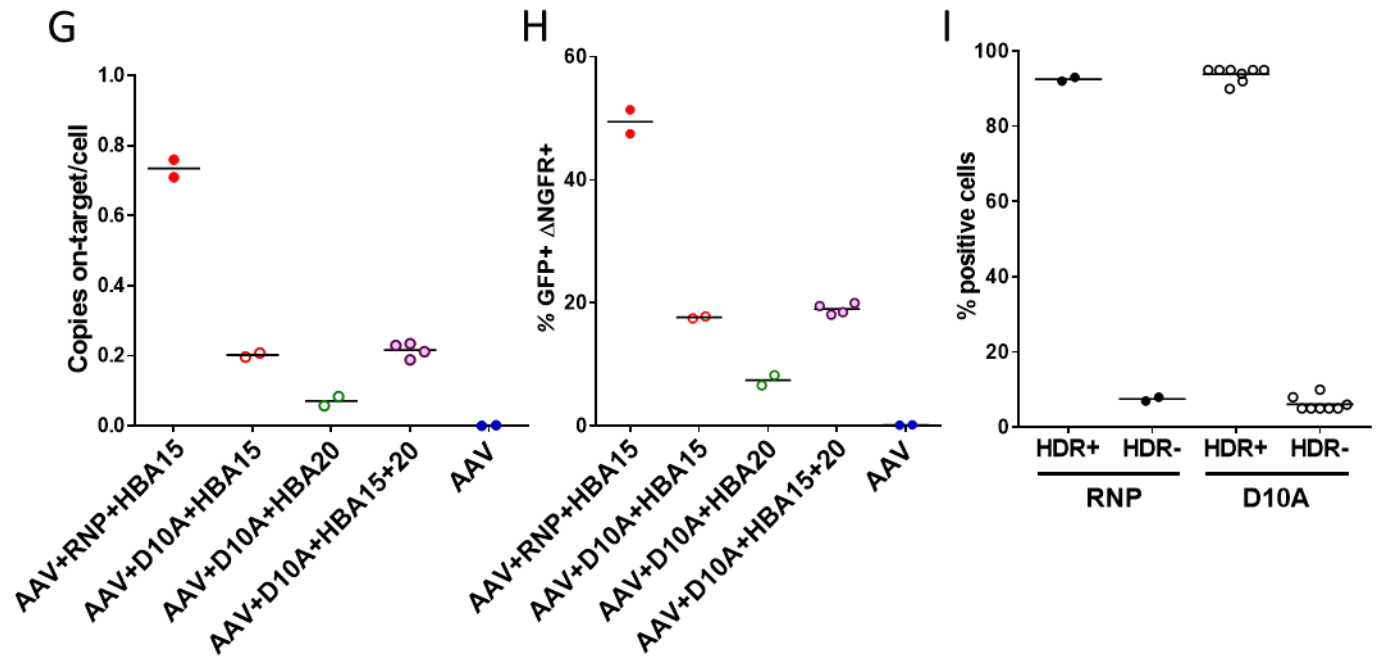

### Supplemental figure 5. Single vs dual nick editing of K562

(A) Genomic location of HBA15 and HBA20 gRNAs. The distance between the two cutting sites is indicated. Red rectangle: HBA start codon. (B-C) Representative InDel spectrum (A) and 1+ nucleotide insertion probability (B) for HBA20. (D) AAV6 donor used for KI experiments. Vector contains a promoterless transgene encoding for the truncated inactive form of the human low affinity nerve growth factor receptor ( $\Delta$ NGFR), followed by a phosphoglycerate kinase (PGK) promoter with a GFP reporter and simian virus polyA (pA). This cassette is flanked by 250 bp homology arms (homology) to gRNA genomic target. ITR, inverted terminal repeats. 1KB scale bar is indicated on top. (E-F) InDels (E) and *HBA2* copies (F) quantification in edited K562 cells. Black lines represent mean. (G-H) AAV knock-in efficiency in term of on-target DNA integration (G) and NGFR/GFP expression (H). Black lines represent mean. (I) Percentage of cells with HDR or not HDR mediated DNA targeted integration (same data of H). HDR+ = (GFP+  $\Delta$ NGFR+ / GFP+) \* 100; HDR- = 100 - HDR+. Black lines represent mean.

A

|            | wt         | 1 $\beta^{AS3}$ | 2 $\beta^{AS3}$ | Tot |
|------------|------------|-----------------|-----------------|-----|
| wt         | 105        | 11              | 0               | 116 |
| 1 del      | 58         | 16              | 0               | 74  |
| 2 del      | 10         | 2               | 0               | 12  |
| <b>Tot</b> | <b>173</b> | <b>29</b>       | <b>0</b>        |     |

B

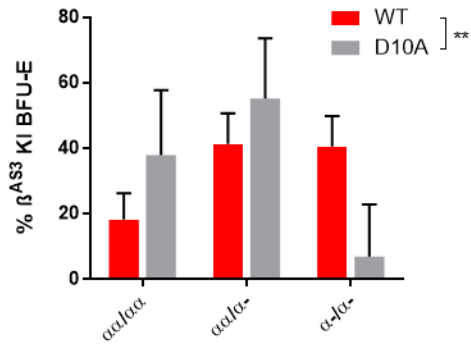

C

|           | Reads | Position (hg19)     | Strand | Type       | Gene   |
|-----------|-------|---------------------|--------|------------|--------|
| ON TARGET | 329   | Chr16_222886/226690 | -      | Exon       | HBA2   |
| OT-1      | 320   | Chr3_141179078      | -      | Intergenic |        |
| OT-2      | 135   | Chr9_77688205       | -      | Intron     | NMRK1  |
| OT-3      | 75    | Chr8_143095162      | +      | Intergenic |        |
| OT-4      | 29    | Chr4_66205583       | -      | Intron     | EPHA5  |
| OT-5      | 28    | Chr5_2859208        | -      | Intergenic |        |
| OT-6      | 20    | Chr20_38984675      | -      | Intergenic |        |
| OT-7      | 16    | Chr10_43101518      | -      | Intron     | ZNF33B |
| OT-8      | 13    | Chr12_117293884     | +      | Intergenic |        |
| OT-9      | 11    | Chr17_26110678      | +      | Intron     | NOS2   |
| OT-10     | 10    | Chr22_22683405      | +      | Intergenic |        |
| OT-11     | 8     | Chr2_217147479      | +      | Intron     | MARCH4 |
| OT-12     | 5     | Chr11_70355141      | -      | Intron     | SHANK2 |
| OT-13     | 4     | Chr6_24657192       | -      | Intron     | TDP2   |
| OT-14     | 4     | Chr6_169440547      | -      | Intergenic |        |
| OT-15     | 3     | Chr2_227599376      | -      | Exon       | IRS1   |

D

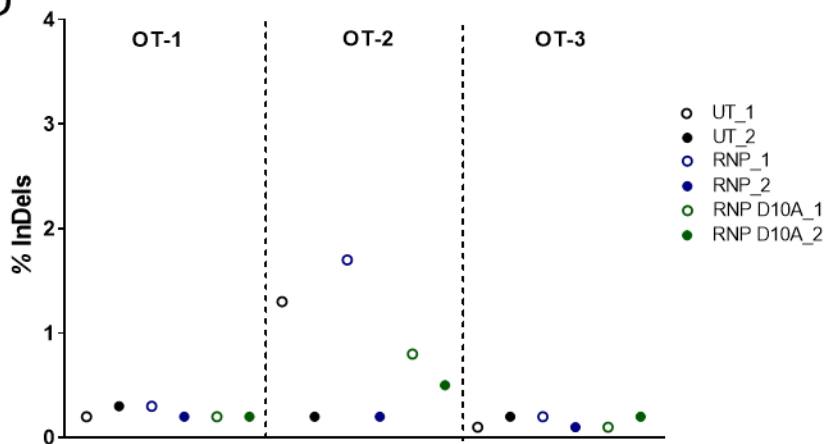

**Supplemental figure 6. CFC and off-target analysis**

(A) Colony genotypes shown in Figure 6H. (B) Genotype of CFC with  $\beta^{AS3}$  transgene integration using Cas9 (WT, gray; n=121) or Cas9 nickase (D10A, red; n=29). Bar represent frequency  $\pm$  confidence intervals (\*\*,  $p < 0.01$ ; Chi-square test). (C) GUIDE-Seq analysis. The on-target sequence and PAM motif are shown in the top line. Off-targets and their mismatches to the on-target site (highlighted in color), sequencing read counts, chromosomal position (hg19), strand and type of genomic region are reported. The majority of off-targets map to intergenic regions or introns except OT-15, which lays in exon 2 of the IRS1 gene that is not expressed in the hematopoietic system. (D) InDel quantification by deep-sequencing of top 3 off-target sites identified by GUIDE-Seq in erythroblasts derived from control and edited HSPCs (n=2 different healthy donors). On-target InDels were 92 and 98% (TIDE) for Cas9 wt. The InDels measured in OT-2 come from amplification/sequencing errors, as mutations in the amplicons are not specific to the gRNA matching sequence.
